# Supplementary material for: Distribution Patterns and Community Assembly Processes of Eukaryotic Microorganisms in Tibetan Plateau Proglacial Lakes at Different Emergence Stages
Source: Copernicus journal article supplement (doi:10.5194/egusphere-2024-3688), 2025-01-27
Supplement: Supplementary file 1 [file egusphere-2024-3688-supplement.pdf]

**Table S1. Detection Limits for Indoor Laboratory Testing Indicators**

| Testing items        | Test method                                       | Instrumentation              | Detection limit |
|----------------------|---------------------------------------------------|------------------------------|-----------------|
| Total phosphorus     | Water and Wastewater Fourth Edition               |                              |                 |
|                      | Determination of phosphorus in water quality      | T6 New Century               |                 |
| Dissolved phosphorus | Phosphomolybdate heteropoly acid                  | UV visible spectrophotometer | 0.001           |
| Orthophosphate       | Spectrophotometry                                 |                              |                 |
| Total nitrogen       | HJ 636-2012                                       |                              |                 |
|                      | Determination of total nitrogen in water quality  | T6 New Century               |                 |
|                      | Alkaline potassium persulfate digestion           | UV visible spectrophotometer | 0.05            |
| Nitrate nitrogen     | UV spectrophotometry                              |                              |                 |
|                      | Water quality - Determination of nitrate nitrogen | T6 New Century               |                 |
|                      | Phenol disulfonic acid spectrophotometry          | UV visible spectrophotometer | 0.02            |
| Ammonia nitrogen     | HJ/T 346-2007                                     |                              |                 |
|                      | HJ 535-2009 Water Quality                         | T6 New Century               |                 |
|                      | Determination of ammonia nitrogen                 | UV visible spectrophotometer | 0.0008          |
| Nitrite              | Hypobromate oxidation method                      |                              |                 |
|                      | water quality                                     |                              |                 |
|                      | Nitrite nitrogen determination                    | T6 New Century               | 0.003           |
| Chlorophyll-a        | Spectrophotometry                                 | UV visible spectrophotometer |                 |
|                      | GB 7493-87                                        |                              |                 |
|                      | Determination of Chlorophyll a by the State       | T6 New Century               | /               |
|                      | Environmental Protection Administration in 2022   | UV visible spectrophotometer |                 |
|                      | (B) 5.1.5 (1)                                     |                              |                 |

**Table S2. Environmental Factor Measurements in Kuoqiongngangri Proglacial Lakes**

| Site | TN<br>(mg/L) | NO <sub>3</sub> -N<br>(mg/L) | NO <sub>2</sub> -N<br>(mg/L) | NH <sub>4</sub> -N<br>(mg/L) | TP<br>(μg/L) | TDP<br>(μg/L) | PO <sub>4</sub> <sup>3-</sup><br>(μg/L) | PP<br>(μg/L) | Chla<br>(μg/L) | WT<br>(°C) | pH   | EC<br>(μs/cm) | SAL<br>(‰) | TUR<br>(NTU) | DO<br>(mg/L) | Periods |
|------|--------------|------------------------------|------------------------------|------------------------------|--------------|---------------|-----------------------------------------|--------------|----------------|------------|------|---------------|------------|--------------|--------------|---------|
| S-NL | 0.133        | 0.063                        | 0.003                        | 0.005                        | 12.6         | 7.87          | 4.2                                     | 4.73         | 0.29           | 2.6        | 8.1  | 22            | 0.022      | 8            | 5.08         | May     |
| B-NL | 0.193        | 0.048                        | 0.005                        | 0.005                        | 16.03        | 8.6           | 5.17                                    | 7.43         | 0.83           | 1.8        | 8.1  | 23            | 0.023      | 10           | 3.14         | May     |
| S-EL | 0.397        | 0.124                        | 0.011                        | 0.007                        | 17.27        | 12.2          | 9.5                                     | 5.07         | 0.88           | 8.8        | 9.2  | 84            | 0.041      | 9.2          | 4.73         | May     |
| B-EL | 0.43         | 0.126                        | 0.013                        | 0.012                        | 19.3         | 14.23         | 11.17                                   | 5.07         | 1.53           | 8          | 9.3  | 78            | 0.041      | 22           | 4.1          | May     |
| S-NL | 0.168        | 0.093                        | 0.004                        | 0.005                        | 18.67        | 13            | 9.17                                    | 5.67         | 0.44           | 10.2       | 8.53 | 12            | 0.012      | 58           | 5.95         | August  |
| B-NL | 0.24         | 0.073                        | 0.007                        | 0.009                        | 19.67        | 15.3          | 9.7                                     | 4.37         | 1.17           | 6.8        | 8.62 | 10            | 0.01       | 96           | 3.76         | August  |
| S-EL | 0.52         | 0.168                        | 0.014                        | 0.013                        | 26.7         | 19.5          | 15.6                                    | 7.2          | 1.79           | 14.6       | 8.66 | 66            | 0.034      | 64           | 6.61         | August  |
| B-EL | 0.59         | 0.202                        | 0.017                        | 0.012                        | 29.47        | 20.63         | 17.6                                    | 8.83         | 2.67           | 13.8       | 8.7  | 76            | 0.035      | 110          | 5.35         | August  |

(Note: "S-NL" denotes the surface layer of proglacial lakes, while "B-NL" refers to the bottom layer. This notation applies similarly throughout the study.)

**Table S3. Environmental factors (mean ± standard deviation) at various classification levels of the Kuoqiongngangri proglacial lake.**

| Environment factors | Different lakes |             |             | Different layers |             | Different periods |             |
|---------------------|-----------------|-------------|-------------|------------------|-------------|-------------------|-------------|
|                     | NL              | ML          | EL          | pls              | plb         | May               | August      |
| TN (mg/L)           | 0.182±0.045     | 0.308±0.097 | 0.462±0.059 | 0.273±0.113      | 0.370±0.120 | 0.294±0.099       | 0.360±0.140 |

|                                      |             |             |             |             |             |             |             |
|--------------------------------------|-------------|-------------|-------------|-------------|-------------|-------------|-------------|
| NO <sub>3</sub> -N (mg/L)            | 0.069±0.013 | 0.120±0.025 | 0.149±0.026 | 0.117±0.029 | 0.116±0.042 | 0.101±0.026 | 0.135±0.041 |
| NO <sub>2</sub> -N (mg/L)            | 0.005±0.001 | 0.007±0.003 | 0.014±0.002 | 0.007±0.004 | 0.01±0.004  | 0.008±0.004 | 0.009±0.004 |
| NH <sub>3</sub> -N (mg/L)            | 0.006±0.002 | 0.008±0.002 | 0.01±0.002  | 0.007±0.003 | 0.009±0.002 | 0.007±0.002 | 0.009±0.003 |
| TP (µg/L)                            | 17.24±2.39  | 19.28±3.42  | 22.71±4.05  | 18.61±3.69  | 20.93±3.83  | 15.95±1.71  | 22.89±3.23  |
| TDP (µg/L)                           | 11.03±2.23  | 12.83±2.78  | 15.86±3.03  | 12.28±3.15  | 14.23±3.03  | 10.35±1.97  | 15.86±2.58  |
| PO <sub>4</sub> <sup>3-</sup> (µg/L) | 6.86±1.89   | 9.80±2.81   | 12.46±2.76  | 8.95±3.11   | 10.81±3.16  | 7.46±2.40   | 12.29±2.63  |
| PP (µg/L)                            | 6.21±1.22   | 6.45±1.14   | 6.85±1.23   | 6.33±0.97   | 6.69±1.39   | 5.61±0.95   | 7.03±1.27   |
| Chla (µg/L)                          | 0.63±0.34   | 1.01±0.43   | 1.69±0.63   | 0.78±0.42   | 1.46±0.58   | 0.79±0.32   | 1.38±0.67   |
| WT (°C)                              | 3.31±2.81   | 8.72±2.62   | 10.78±1.97  | 8.64±3.87   | 7.46±3.35   | 6.89±3.24   | 10.1±3.44   |
| pH                                   | 8.36±0.22   | 8.16±0.64   | 8.91±0.25   | 8.22±0.56   | 8.59±0.54   | 8.19±0.76   | 8.65±0.38   |
| EC (µg/cm)                           | 17.9±5.19   | 69.26±15.57 | 84.42±12.15 | 63.48±27.63 | 60.23±27.49 | 74.62±23.17 | 47.94±23.70 |
| SAL (‰)                              | 0.02±0.005  | 0.03±0.008  | 0.04±0.005  | 0.033±0.001 | 0.031±0.001 | 0.037±0.006 | 0.024±0.009 |
| TUR (NTU)                            | 38.05±29.1  | 109.6±74.56 | 40.93±31.23 | 52.07±38.58 | 99.82±80.73 | 35.32±27.94 | 129.81±77.5 |
| DO (mg/L)                            | 4.51±1.11   | 4.57±0.8    | 5.19±0.61   | 5.30±0.63   | 4.13±0.70   | 4.25±0.68   | 5.17±0.89   |

**Table S4. Mann-Whitney U test and Wilcoxon Signed Rank Test results of environmental factors between different groups.**

| Environment factors           | Different lakes |       |       | Different layers | Different periods |
|-------------------------------|-----------------|-------|-------|------------------|-------------------|
|                               | NL-ML           | NL-EL | ML-EL | Pls-plb          | May-August        |
| TN                            | 0.000           | 0.000 | 0.000 | 0.032            | 0.020             |
| NO <sub>3</sub> _N            | 0.000           | 0.000 | 0.015 | 0.853            | 0.000             |
| NO <sub>2</sub> _N            | 0.002           | 0.000 | 0.001 | 0.020            | 0.051             |
| NH <sub>3</sub> _N            | 0.015           | 0.000 | 0.006 | 0.016            | 0.001             |
| TP                            | 0.130           | 0.009 | 0.015 | 0.137            | 0.000             |
| TDP                           | 0.034           | 0.009 | 0.034 | 0.094            | 0.000             |
| PO <sub>4</sub> <sup>3-</sup> | 0.002           | 0.000 | 0.023 | 0.163            | 0.000             |
| PP                            | 0.363           | 0.114 | 0.287 | 0.852            | 0.002             |
| Chla                          | 0.034           | 0.000 | 0.015 | 0.000            | 0.001             |
| WT                            | 0.000           | 0.002 | 0.288 | 0.026            | 0.000             |
| pH                            | 0.544           | 0.000 | 0.015 | 0.020            | 0.000             |
| EC                            | 0.000           | 0.000 | 0.762 | 0.577            | 0.000             |
| SAL                           | 0.000           | 0.000 | 0.225 | 0.780            | 0.000             |
| TUR                           | 0.002           | 0.295 | 0.002 | 0.026            | 0.000             |
| DO                            | 0.363           | 0.116 | 0.130 | 0.000            | 0.000             |

(\*<0.05, \*\*<0.01, \*\*\*<0.001)

**Table S5. SIMPER analysis of eukaryotic microbial community structure similarity across different spatial and temporal contexts.**

| classification  | Groups   | Major contributor taxa | Contribution rate (%) |
|-----------------|----------|------------------------|-----------------------|
| Different lakes | G(NL-ML) | <i>Bacillariophyta</i> | 35.12                 |
|                 |          | <i>Chlorophyta</i>     | 34.73                 |
|                 |          | <i>Gastrotricha</i>    | 6.48                  |
|                 | G(ML-EL) | <i>Ciliophora</i>      | 34.14                 |
|                 |          | <i>Chlorophyta</i>     | 30.21                 |
|                 |          | <i>Bacillariophyta</i> | 6.35                  |
|                 | G(NL-EL) | <i>Cryptomycota</i>    | 34.84                 |

|                  |            |                    |       |
|------------------|------------|--------------------|-------|
| Different layers | G(pls-plb) | <i>Chlorophyta</i> | 32.41 |
|                  |            | <i>Apicomplexa</i> | 5.39  |
|                  |            | <i>Chlorophyta</i> | 34.71 |
|                  |            | <i>Cercozoa</i>    | 32.18 |
|                  |            | <i>Nematoda</i>    | 6.13  |

**Table S6. Key topological characteristics of eukaryotic microbial symbiotic networks.**

| Network topology indicators | NL     | ML     | EL     | pls    | plb    | May    | August |
|-----------------------------|--------|--------|--------|--------|--------|--------|--------|
| Number of connections       | 4392   | 4774   | 18262  | 7245   | 7014   | 4314   | 9236   |
| Average degree              | 43.059 | 32.699 | 94.377 | 41.758 | 37.013 | 28.196 | 45.054 |
| Network diameter            | 4      | 6      | 5      | 6      | 6      | 7      | 6      |
| Mean path length            | 2.029  | 2.477  | 2.055  | 2.571  | 2.508  | 2.73   | 2.55   |
| Density of figure           | 0.212  | 0.112  | 0.245  | 0.121  | 0.098  | 0.092  | 0.11   |
| Modularity coefficient      | 1.419  | 0.655  | 0.214  | 0.5    | 0.795  | 0.786  | 0.64   |
| Mean clustering coefficient | 0.603  | 0.61   | 0.671  | 0.672  | 0.621  | 0.645  | 0.626  |
| Positive correlation (%)    | 64.32  | 81.72  | 80.15  | 95.39  | 88.34  | 90.09  | 90.02  |
| Negative correlation (%)    | 35.68  | 18.28  | 19.85  | 4.61   | 11.66  | 9.81   | 9.98   |

**Table S7. Mantel test results for correlations between environmental variables.**

| /                             | Chla | TN   | NO <sub>3</sub> -N | NO <sub>2</sub> -N | NH <sub>3</sub> -N | TP   | TDP  | PO <sub>4</sub> <sup>3-</sup> | PP   | WT   | pH   | EC    | SAL   | TUR   | DO    |
|-------------------------------|------|------|--------------------|--------------------|--------------------|------|------|-------------------------------|------|------|------|-------|-------|-------|-------|
| Chla                          | 0    | 0.79 | 0.66               | 0.83               | 0.86               | 0.78 | 0.80 | 0.77                          | 0.38 | 0.41 | 0.71 | 0.01  | -0.01 | 0.58  | -0.02 |
| TN                            |      | 0    | 0.85               | 0.63               | 0.83               | 0.76 | 0.77 | 0.85                          | 0.33 | 0.57 | 0.65 | 0.25  | 0.20  | 0.45  | 0.10  |
| NO <sub>3</sub> -N            |      |      | 0                  | 0.59               | 0.76               | 0.82 | 0.83 | 0.91                          | 0.46 | 0.86 | 0.60 | 0.17  | 0.09  | 0.59  | 0.48  |
| NO <sub>2</sub> -N            |      |      |                    | 0                  | 0.67               | 0.55 | 0.60 | 0.61                          | 0.28 | 0.42 | 0.60 | 0.33  | 0.30  | 0.33  | 0.19  |
| NH <sub>3</sub> -N            |      |      |                    |                    | 0                  | 0.74 | 0.79 | 0.79                          | 0.12 | 0.48 | 0.70 | 0.02  | 0.03  | 0.52  | 0.10  |
| TP                            |      |      |                    |                    |                    | 0    | 0.97 | 0.94                          | 0.59 | 0.75 | 0.74 | -0.28 | -0.37 | 0.70  | 0.37  |
| TDP                           |      |      |                    |                    |                    |      | 0    | 0.96                          | 0.46 | 0.76 | 0.72 | -0.20 | -0.32 | 0.76  | 0.37  |
| PO <sub>4</sub> <sup>3-</sup> |      |      |                    |                    |                    |      |      | 0                             | 0.45 | 0.79 | 0.67 | -0.04 | -0.17 | 0.72  | 0.39  |
| PP                            |      |      |                    |                    |                    |      |      |                               | 0    | 0.59 | 0.31 | -0.14 | -0.17 | 0.32  | 0.33  |
| WT                            |      |      |                    |                    |                    |      |      |                               |      | 0    | 0.40 | 0.07  | -0.08 | 0.59  | 0.75  |
| pH                            |      |      |                    |                    |                    |      |      |                               |      |      | 0    | -0.28 | -0.27 | 0.39  | 0.16  |
| EC                            |      |      |                    |                    |                    |      |      |                               |      |      |      | 0     | 0.95  | -0.17 | -0.06 |
| SAL                           |      |      |                    |                    |                    |      |      |                               |      |      |      |       | 0     | -0.38 | -0.17 |
| TUR                           |      |      |                    |                    |                    |      |      |                               |      |      |      |       |       | 0     | 0.16  |
| DO                            |      |      |                    |                    |                    |      |      |                               |      |      |      |       |       |       | 0     |

**Table S8. Mantel test results for correlations between environmental variables and  $\beta$  NTI. Significant environmental factors ( $p < 0.05$ ) are highlighted in bold.**

| Environment factors       | NL      |       | ML            |              | EL      |       | pls           |              | plb     |       |
|---------------------------|---------|-------|---------------|--------------|---------|-------|---------------|--------------|---------|-------|
|                           | r       | p     | r             | p            | r       | p     | r             | p            | r       | p     |
| TN (mg/L)                 | 0.1077  | 0.09  | 0.0016        | 0.43         | -0.0405 | 0.588 | 0.0016        | 0.433        | 0.0817  | 0.126 |
| NO <sub>3</sub> -N (mg/L) | -0.0363 | 0.591 | <b>0.2683</b> | <b>0.002</b> | -0.0884 | 0.878 | <b>0.2683</b> | <b>0.005</b> | -0.0721 | 0.799 |
| NO <sub>2</sub> -N (mg/L) | -0.0284 | 0.601 | -0.0420       | 0.701        | -0.0168 | 0.526 | -0.0420       | 0.713        | -0.0308 | 0.619 |
| NH <sub>3</sub> -N (mg/L) | 0.0564  | 0.188 | 0.0410        | 0.276        | 0.0780  | 0.159 | 0.0410        | 0.237        | 0.0763  | 0.113 |

|                                      |               |              |               |              |                |               |               |              |               |              |
|--------------------------------------|---------------|--------------|---------------|--------------|----------------|---------------|---------------|--------------|---------------|--------------|
| TP (µg/L)                            | -0.1029       | 0.899        | -0.1344       | 0.982        | -0.0875        | 0.915         | -0.1344       | 0.984        | -0.1304       | 0.983        |
| TDP (µg/L)                           | -0.1133       | 0.956        | 0.0224        | 0.353        | -0.1049        | 0.974         | 0.0224        | 0.349        | -0.1447       | 0.994        |
| PO <sub>4</sub> <sup>3-</sup> (µg/L) | -0.1221       | 0.968        | 0.0259        | 0.331        | -0.0859        | 0.864         | 0.0259        | 0.358        | -0.1464       | 0.99         |
| PP (µg/L)                            | -0.1084       | 0.962        | 0.0462        | 0.255        | -0.0835        | 0.895         | 0.0462        | 0.259        | -0.1335       | 0.99         |
| Chla (µg/L)                          | 0.0296        | 0.284        | -0.1338       | 0.972        | -0.0557        | 0.679         | -0.1338       | 0.971        | 0.0125        | 0.37         |
| WT (°C)                              | -0.1366       | 0.976        | <b>0.3287</b> | <b>0.003</b> | -0.0312        | 0.524         | <b>0.3287</b> | <b>0.003</b> | -0.1390       | 0.963        |
| pH                                   | -0.0938       | 0.858        | -0.1387       | 0.982        | 0.0654         | 0.25          | -0.1387       | 0.979        | -0.0560       | 0.727        |
| EC (µg/cm)                           | <b>0.2348</b> | <b>0.002</b> | <b>0.3481</b> | <b>0.001</b> | -0.0926        | 0.982         | <b>0.3481</b> | <b>0.001</b> | <b>0.1841</b> | <b>0.009</b> |
| SAL (‰)                              | <b>0.2539</b> | <b>0.002</b> | 0.1822        | 0.007        | <b>-0.0166</b> | <b>0.0498</b> | <b>0.1822</b> | <b>0.005</b> | <b>0.2327</b> | <b>0.005</b> |
| TUR (NTU)                            | 0.0048        | 0.416        | -0.0716       | 0.696        | 0.0072         | 0.306         | -0.0716       | 0.679        | -0.0050       | 0.46         |
| DO (mg/L)                            | 0.0706        | 0.216        | <b>0.2769</b> | <b>0.001</b> | 0.0219         | 0.353         | <b>0.2769</b> | <b>0.001</b> | 0.0739        | 0.191        |

Fig. S1.

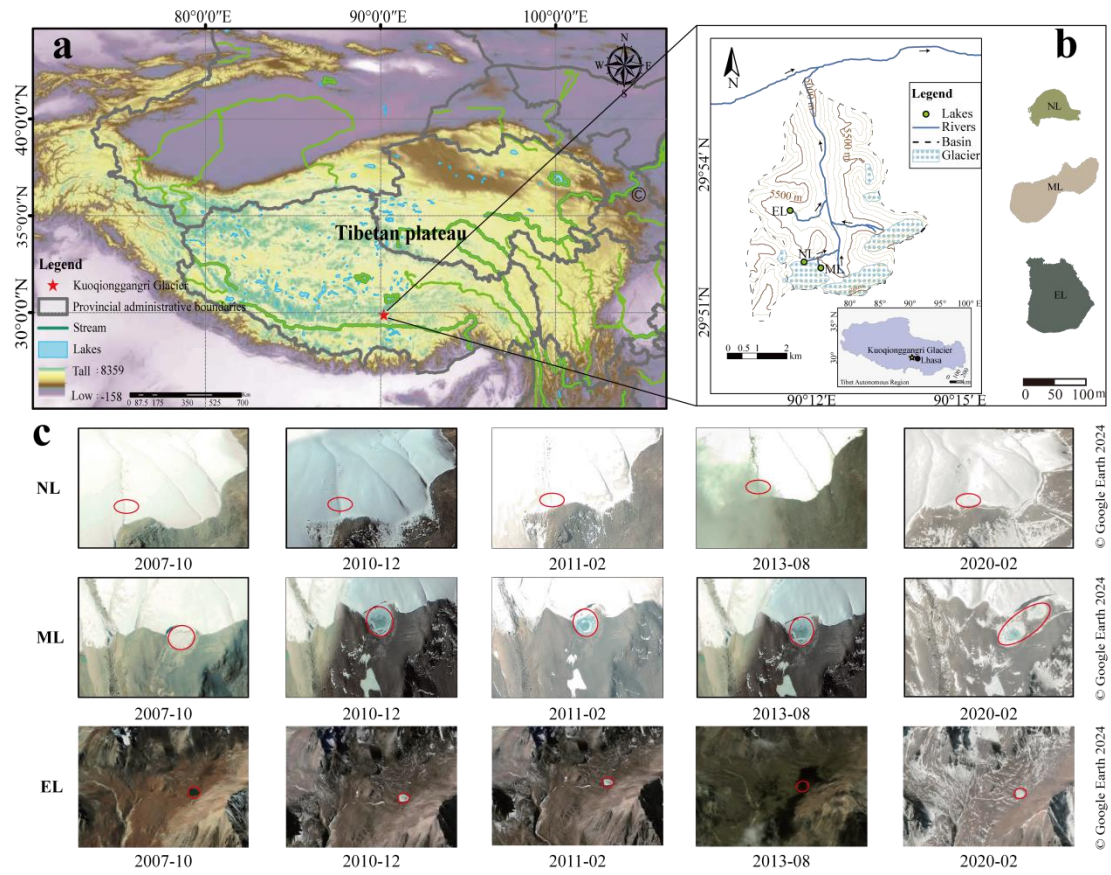

Fig. S1. Study area location and images showing changes in the three proglacial lakes (highlighted with red circles) sourced from © Google Earth.

Fig. S2.

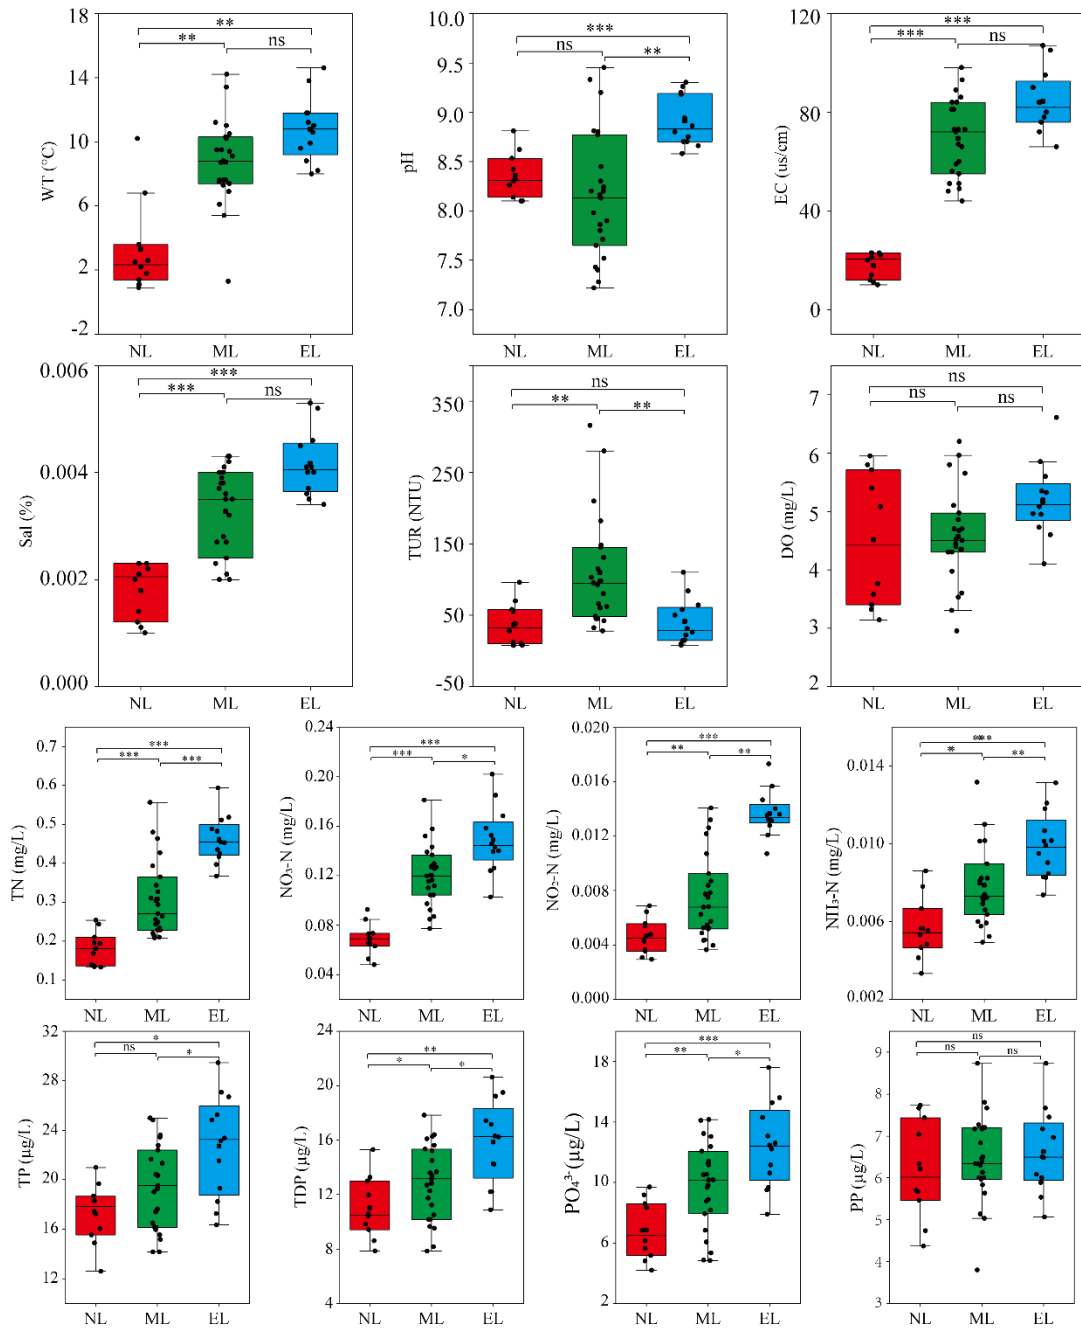

Fig. S2. Environmental characteristics of proglacial lakes across different historical development periods. (Note: \*\*, extremely significant difference; \*, significant difference; ns, no statistically significant)

Fig. S3.

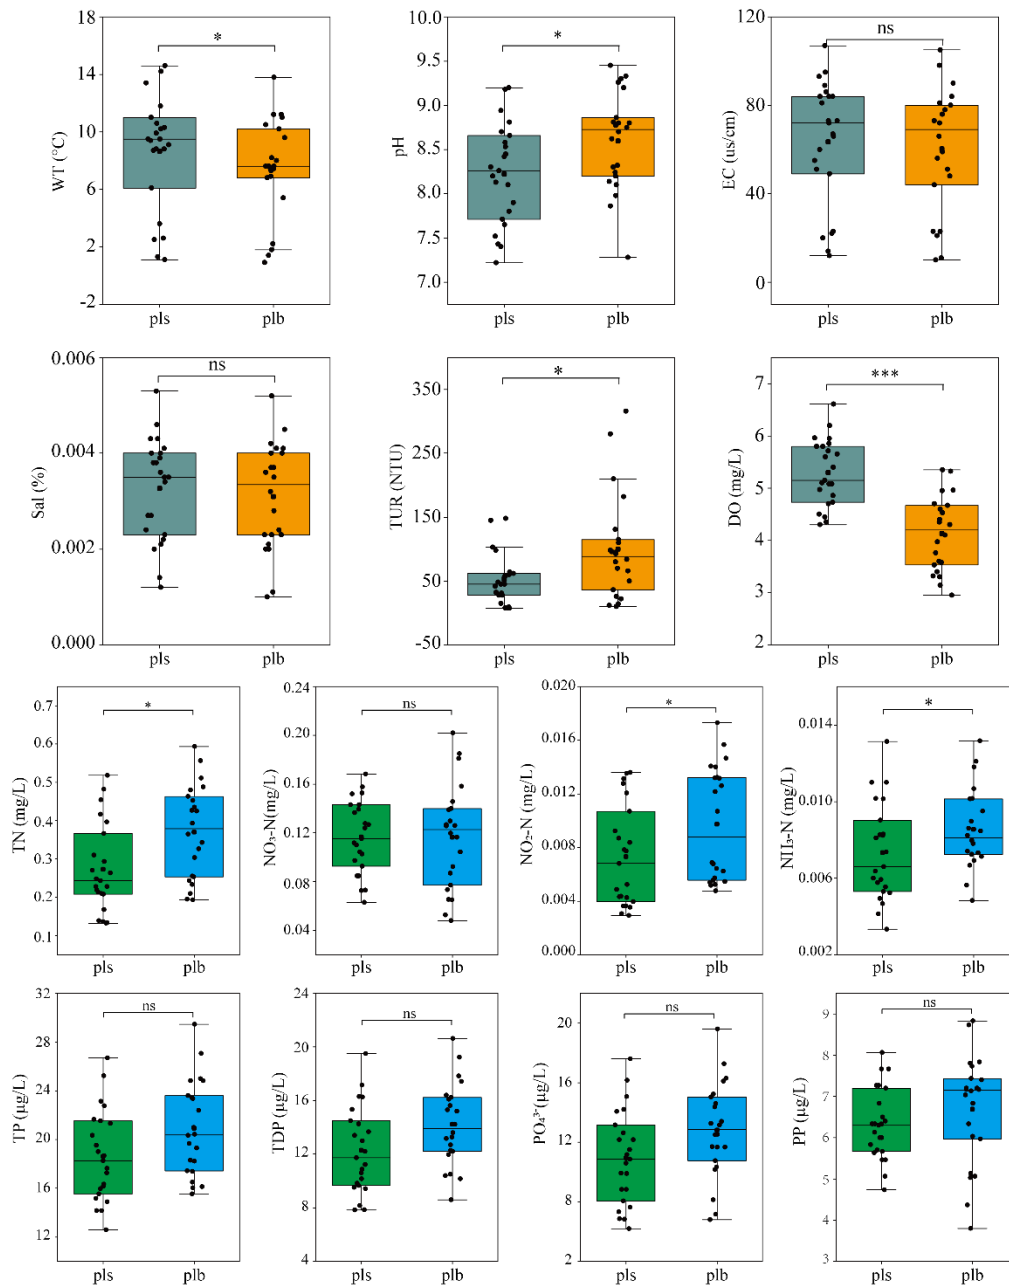

Fig. S3. Characteristics of Environmental Factors in the Surface and Bottom Layers of Proglacial Lakes. (Note: \*\*, extremely significant difference; \*, significant difference; ns, no statistically significant)

Fig. S4.

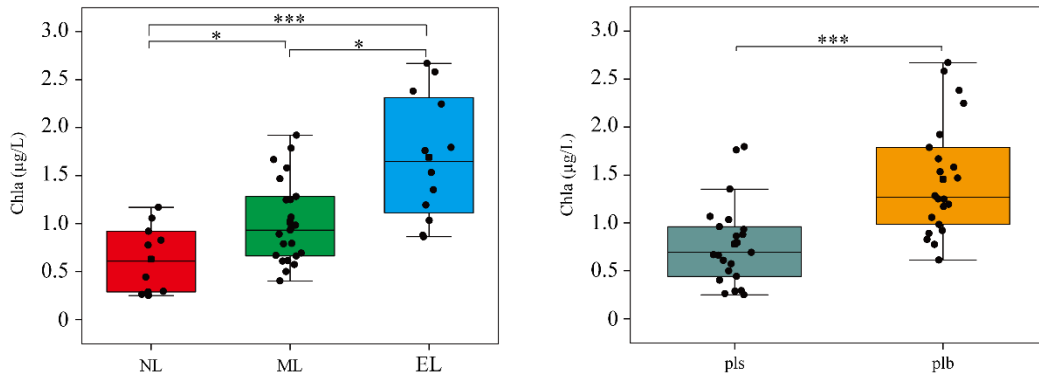

Fig. S4. Chlorophyll-a (Chla) Characteristics in Different Proglacial Lakes and Between Surface and

Bottom Layers.

(Note: \* \*, extremely significant difference; \*, significant difference)

Fig. S5.

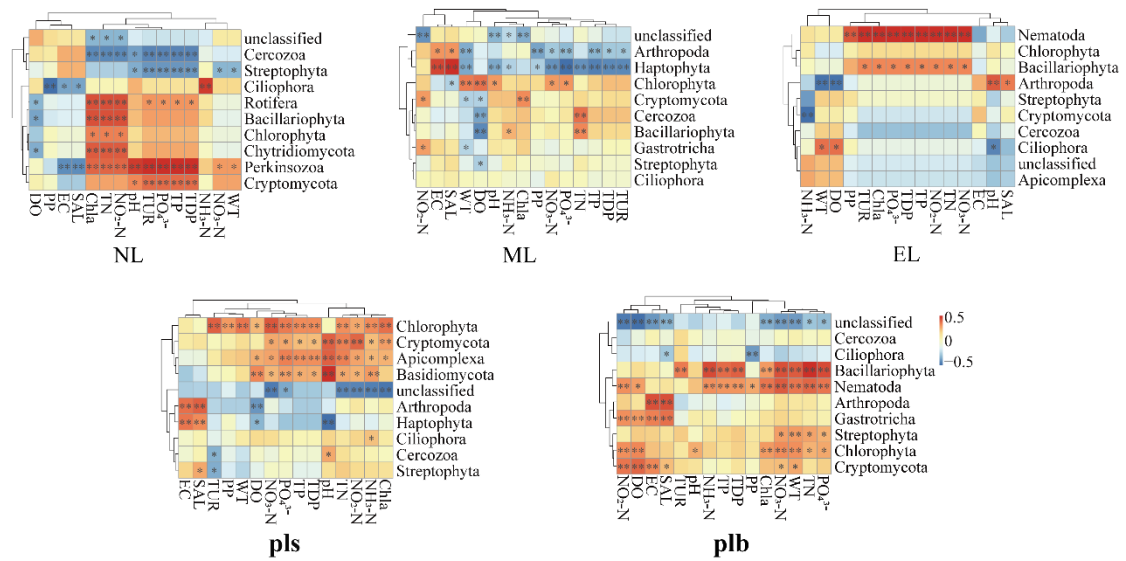

Fig. S5. Correlation Analysis Between Key Species and Environmental Factors in Proglacial Lakes.
